# Supplementary material for: Electronic Detection of DNA Hybridization by Coupling Organic Field-Effect Transistor-Based Sensors and Hairpin-Shaped Probes
Source: PubMed Central journal article supplement (PMC5948917; doi:10.3390/s18040990), 2018-03-27
Supplement: sensors-18-00990-s001.pdf [file sensors-18-00990-s001.pdf]

# Supporting information for: “Electronic detection of DNA hybridization by coupling Organic Field-Effect transistor-based sensor and hairpin-shaped probes”

Corrado Napoli <sup>1\*</sup>, Stefano Lai <sup>1</sup>, Ambra Giannetti <sup>2</sup>, Sara Tombelli <sup>2</sup>, Francesco Baldini <sup>2</sup>, Massimo Barbaro <sup>1</sup>, and Annalisa Bonfiglio <sup>1</sup>

- <sup>1</sup> Department of Electrical and Electronic Engineering, University of Cagliari, 09123 Cagliari, Italy;  
<sup>2</sup> Istituto di Fisica Applicata “Nello Carrara”, Consiglio Nazionale delle Ricerche, 50019 Sesto Fiorentino, Italy;  
\* Correspondence: corrado.napoli@diee.unica.it; Tel.: +39-070-675-5769

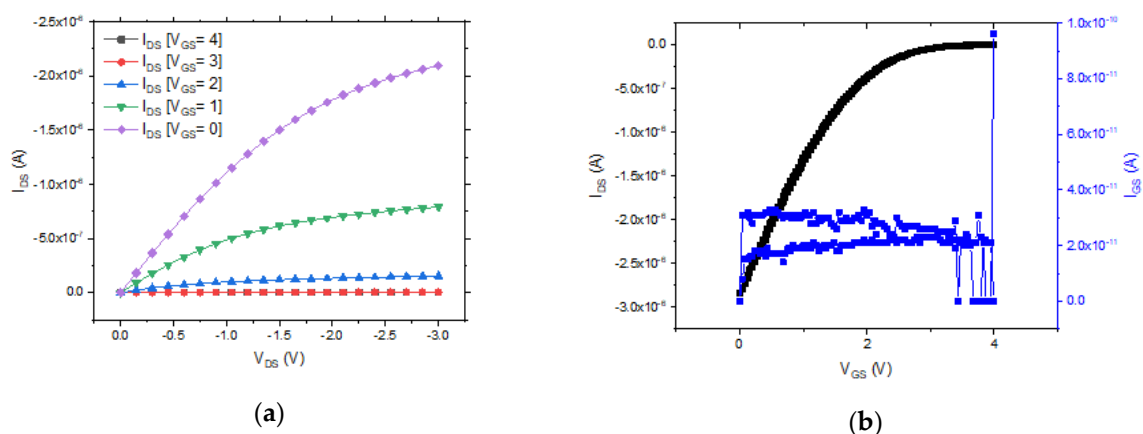

**Figure S1.** Output characteristic (a) and transfer characteristic (b) of an OCMFET sensor.

**Table S1.** Electrical parameters of OCMFET sensors, averaged on 6 devices.

| $V_{TH}$ (V)  | $\mu$ ( $\text{cm}^2/\text{Vs}$ ) | $I_{ON}$ ( $\mu\text{A}$ ) | $I_{OFF}$ (nA) |
|---------------|-----------------------------------|----------------------------|----------------|
| $4.0 \pm 0.6$ | $0.010 \pm 0.003$                 | $-1.3 \pm 0.7$             | $-2 \pm 1$     |

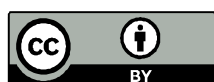

© 2018 by the authors. Submitted for possible open access publication under the terms and conditions of the Creative Commons Attribution (CC BY) license (<http://creativecommons.org/licenses/by/4.0/>).
